# Supplementary material
Source: PubMed Central journal article supplement (PMC2493558)
Supplement: 00169.2008_1.pdf [file 00169.2008_1.pdf]

## **CAPTION OF MOVIES**

All movies are digital time-lapse phase microscopy images that were taken every 30 second for designated time. Each movie was generated at 30 fps from one typical area of a time-lapse image sequence. Small particles seen in some of the movies are debris from the serum in the medium. In the movies with shear flow, the medium was flowing in a left-to-right direction, providing a shear force of 4 dyn/cm<sup>2</sup>.

Movie 1: CHO cells on fibronectin with shear flow, 6 hours.

Movie 2: CHO- $\alpha$ 4WT cells on fibronectin with shear flow, 4 hours.

Movie 3: CHO- $\alpha$ 4WT cells on FNIII12-V<sub>120-15</sub> (contains CS-1) with shear flow, 6 hours.

Movie 4: CHO- $\alpha$ 4WT cells on FNIII7-11 (contains RGD) with shear flow, 4 hours.

Movie 5: CHO- $\alpha$ 4WT cells on fibronectin without shear flow, 6 hours.

Movie 6: CHO- $\alpha$ 4WT cells on CS-1 without shear flow, 4 hours.

Movie 7: CHO- $\alpha$ 4Y991A cells on fibronectin with shear flow, 6 hours.

Movie 8: CHO- $\alpha$ 4Y991A cells on CS-1 with shear flow, 4 hours.

Movie 9: CHO- $\alpha$ 4S988A cells on fibronectin with shear flow, 6 hours.

Movie 10: CHO- $\alpha$ 4S988A cells on CS-1 with shear flow, 3 hours.

Movie 11: CHO- $\alpha$ 4DM cells on fibronectin with shear flow, 6 hours.

Movie 12: CHO- $\alpha$ 4DM cells on CS-1 with shear flow, 3 hours.
